# Developing an automated iterative near-term forecasting system for an ecological study

*Ethan P. White<sup>1,2,3</sup>, Glenda M. Yenni<sup>1</sup>, Shawn D. Taylor<sup>4</sup>, Erica M.  
Christensen<sup>1</sup>, Ellen K. Bledsoe<sup>4</sup>, Juniper L. Simonis<sup>1</sup>, S. K. Morgan  
Ernest<sup>1,3</sup>*

<sup>1</sup> Department of Wildlife Ecology and Conservation, University of Florida, Gainesville,  
FL, United States

<sup>2</sup> Informatics Institute, University of Florida, Gainesville, FL, United States

<sup>3</sup> Biodiversity Institute, University of Florida, Gainesville, FL, United States

<sup>4</sup> School of Natural Resources and Environment, University of Florida Gainesville, FL,  
United States

## Abstract

1. Most forecasts for the future state of ecological systems are conducted once and never updated or assessed. As a result, many available ecological forecasts are not based on the most up-to-date data, and the scientific progress of ecological forecasting models is slowed by a lack of feedback on how well the forecasts perform.
2. Iterative near-term ecological forecasting involves repeated daily to annual scale

forecasts of an ecological system as new data becomes available and regular assessment of the resulting forecasts. We demonstrate how automated iterative near-term forecasting systems for ecology can be constructed by building one to conduct monthly forecasts of rodent abundances at the Portal Project, a long-term study with over 40 years of monthly data. This system automates most aspects of the six stages of converting raw data into new forecasts: data collection, data sharing, data manipulation, modeling and forecasting, archiving, and presentation of the forecasts.

3. The forecasting system uses R code for working with data, fitting models, making forecasts, and archiving and presenting these forecasts. The resulting pipeline is automated using continuous integration (a software development tool) to run the entire pipeline once a week. The cyberinfrastructure is designed for long-term maintainability and to allow the easy addition of new models. Constructing this forecasting system required a team with expertise ranging from field site experience to software development.

4. Automated near-term iterative forecasting systems will allow the science of ecological forecasting to advance more rapidly and provide the most up-to-date forecasts possible for conservation and management. These forecasting systems will also accelerate basic science by allowing new models of natural systems to be quickly implemented and compared to existing models. Using existing technology, and teams with diverse skill sets, it is possible for ecologists to build these systems and use them to advance our understanding of natural systems.

Key-words: forecasting, prediction, mammals, iterative forecasting, Portal Project

# Introduction

Forecasting the future state of ecological systems is important for management, conservation, and evaluation of how well models capture the processes governing ecological systems (Clark et al., 2001; Tallis & Kareiva, 2006; Díaz et al., 2015; Dietze, 2017). In 2001, Clark et al. (2001) called for a more central role of forecasting in ecology. Since then, an increasing number of ecological forecasts are being published. Most of these forecasts, however, are made once, published, and never assessed or updated. This lack of both regular assessment and active updating has limited the progress of ecological forecasting and hindered our ability to make useful and reliable predictions. The lack of active assessment results in limited information on how much confidence to place in forecasts and makes it difficult to determine on which forecasting methods to build. Without regular updates, forecasts lack the most current data, and the longer a forecast remains out of date, the less accurate it becomes (Petchey et al., 2015; Dietze et al., 2018). More regular updating and assessment will advance ecological forecasting as a field by accelerating the identification of the best models for individual forecasts and improving our understanding of how to best design forecasting approaches for ecology in general. For ecological forecasting to mature as a field, we need to change how we produce and interact with forecasts, creating a more dynamic interplay between model development, prediction generation, and incorporation of new data and information (Dietze et al., 2018).

With the goal of making ecological forecasting more dynamic and responsive, Dietze et al (2018) recently called for an increase in iterative near-term forecasting. Iterative near-term forecasting is defined as making predictions for the near future and repeatedly updating those predictions through a cycle of evaluation, integration of new data, and generation of new forecasts. Because forecasts are made ‘near-term’—daily to annual time scales instead of multi-decadal—predictions can be assessed more quickly and frequently, leading to more rapid model improvements (Tredennick et al., 2016; Dietze

et al., 2018). Since forecasts are made repeatedly through time, new data can be continuously integrated with each iteration (Dietze et al., 2018). By quickly identifying how models are failing, facilitating rapid testing of improved models, and incorporating the most up-to-date data available, iterative near-term forecasting has the potential to promote rapid improvement in the state of ecological forecasting. In addition to yielding improved information for guiding policy and management (Clark et al., 2001; Luo et al., 2011; Petchey et al., 2015), this iterative approach will help improve our basic understanding of ecological systems (Dietze et al., 2018). For example, alternative mechanistic models can be compared to determine which model provides the best forecasts, thus providing insights into the importance of different ecological processes (Dietze et al., 2018). Iterative near-term forecasting provides the more dynamic interplay between models, predictions, and data that has been identified as necessary for improving ecological forecasting and our understanding of ecological systems more broadly.

Because iterative near-term forecasting requires a dynamic integration of models, predictions, and data, Dietze et al (2018) highlight approaches to data management, model construction and evaluation, and cyberinfrastructure that are necessary to effectively implement this type of forecasting (Box 1). Data needs to be released quickly under open licenses (Vargas et al., 2017; Dietze et al., 2018) and structured so that it can be used easily by a variety of researchers and in multiple modeling approaches (Borer et al., 2009; Strasser et al., 2011). Models need to be able to deal with uncertainty, in both the predictors and the predictions, to properly convey uncertainty in the resulting forecasts (Diniz-Filho et al., 2009). Multiple models should be developed, both to assess which models are performing best (Dietze et al., 2018) and to facilitate combining models to form ensemble predictions which tend to perform better than single models (Araujo & New, 2007; Diniz-Filho et al., 2009). Ensuring that data and models are regularly updated and new forecasts are made requires cyberinfrastructure to automate

97 data processing, model fitting, prediction, model evaluation, forecast visualization, and  
98 archiving. In combination, these approaches should allow forecasts to be easily rerun  
99 and evaluated as new data becomes available (Box 1; Dietze et al., 2018).

100 While iterative near-term forecasting is an important next step in the evolution of  
101 ecological forecasting, the requirements outlined by Dietze et al (Box 1) are not trivial  
102 to implement, and few of their recommendations are in widespread use in ecology today.  
103 We explored what it would entail to operationalize Dietze et al's recommendations by  
104 constructing our own iterative near-term forecasting pipeline for an on-going, long-term  
105 ecological study that collects high-frequency data on desert rodent abundances (J. H.  
106 Brown, 1998; Ernest et al., 2008). We constructed an automated forecasting pipeline  
107 with the goal of being able to forecast rodent abundances and evaluate our predictions  
108 on a monthly basis. In this paper, we discuss our approach for creating this iterative  
109 near-term forecasting pipeline, the challenges we encountered, the tools we used, and  
110 the lessons we learned so that others can create their own iterative forecasting systems.

## 111 **System Background**

112 Iterative forecasting is most effective with frequently collected data, since it provides  
113 more opportunities for updating model results and assessing (and potentially improving)  
114 model performance (Box 1; Dietze et al., 2018). The Portal Project is a long-term  
115 ecological study situated in the Chihuahuan Desert (2 km north and 6.5 km east of  
116 Portal, Arizona, US). Researchers have been continuously collecting data at the site  
117 since 1977, including data on the abundance of rodent and plant species (monthly and  
118 twice yearly, respectively) and climatic factors such as air temperature and precipitation  
119 (daily) (J. H. Brown, 1998; Ernest et al., 2009, 2016). The site consists of 24 50m x  
120 50m experimental plots. Each plot contains 49 permanently marked trapping stations  
121 laid out in a 7 x 7 grid, and all plots are trapped with Sherman live traps for one night

122 each month. For all rodents caught during a trapping session, information on species  
123 identity, size, and reproductive condition is collected, and new individuals are given  
124 identification tags. This information on rodent populations is high-frequency, uses  
125 consistent trapping methodology, and has an extended time-series (470 monthly samples  
126 and counting), making this study an ideal case for near-term iterative forecasting.

## 127 **Implementing an automated iterative forecasting system**

128 Implementation of iterative forecasting requires the regular rebuilding of models with  
129 new raw data as it becomes available and the presentation of those forecasts in usable  
130 forms; in our case, this occurs monthly. Rebuilding models in an efficient and  
131 maintainable way relies on developing an automated pipeline to handle the six stages of  
132 converting raw data into new forecasts: data collection, data sharing, data manipulation,  
133 modeling and forecasting, archiving, and presentation of the forecasts (Figure 1a). To  
134 implement the pipeline outlined in Figure 1a, we used a “continuous analysis”  
135 framework (*sensu* Beaulieu-Jones & Greene, 2017) that automatically processes the  
136 most up-to-date data, refits the models, makes new forecasts, archives the forecasts, and  
137 updates a website with analysis of current and previous forecasts. In this section we  
138 describe our approach to streamlining and automating the multiple components of the  
139 forecasting pipeline and the tools and infrastructure we employed to execute each  
140 component.

## 141 **Continuous Analysis Framework**

142 A core aspect of iterative near-term forecasting is the regular rerunning of the  
143 forecasting pipeline. We employed “continuous analysis” (*sensu* Beaulieu-Jones &  
144 Greene, 2017) to drive the automation of both the full pipeline and a number of its  
145 individual components. Continuous analysis uses a set of tools originally designed for

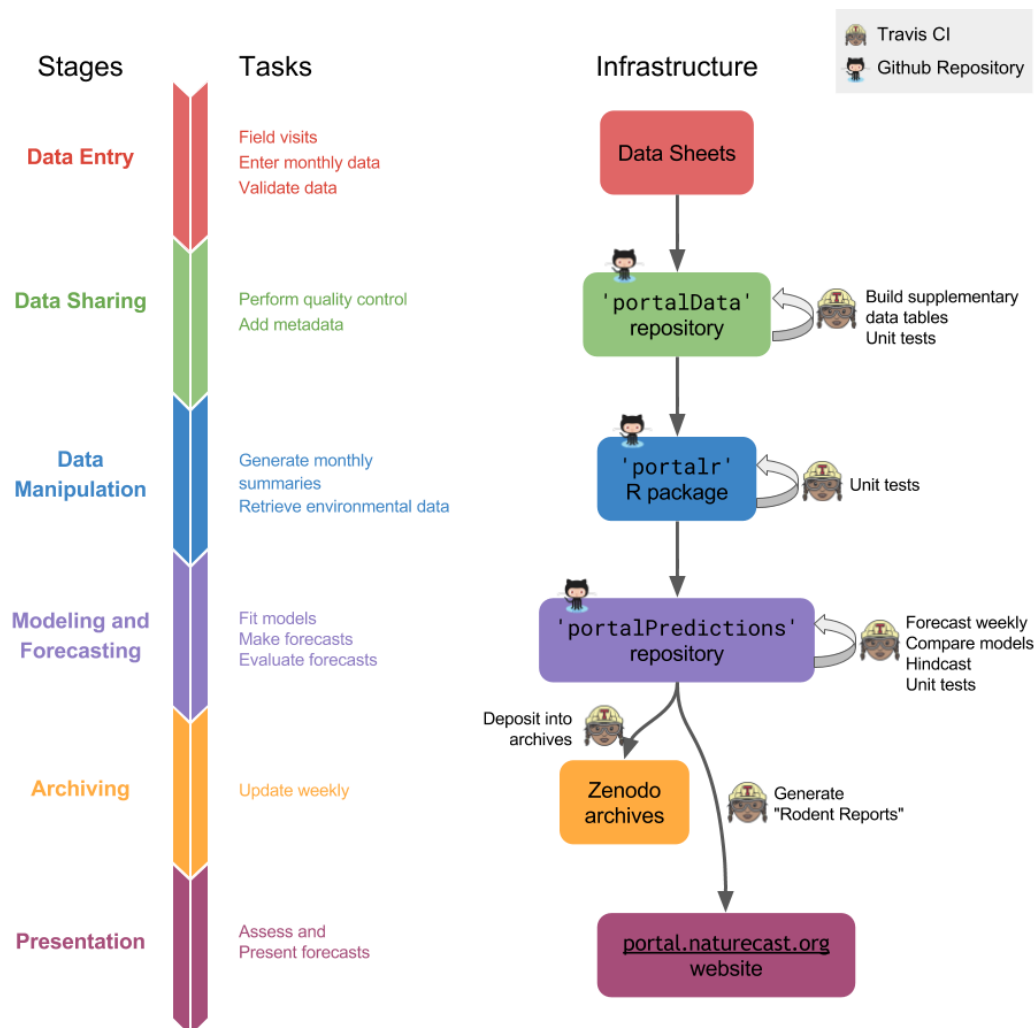

Figure 1: Figure 1. a) Stages of the forecasting pipeline. To go from raw data to forecast presentation involves a number of stages, each of which requires unique tasks, tools and infrastructure. The stages are interdependent, with outputs from one stage forming the inputs for the subsequent stage. Tasks in all stages are run using code written in R. b) Continuous integration system. Each box denotes the core infrastructure used for each stage of the forecasting pipeline. Continuous integration (denoted by the Travis icon, a woman wearing safety glasses and hardhat) triggers the code involved in events that link the stages of the pipeline, such as using the output from the forecasting stage (purple box) to create an updated website (rose box). Travis also runs tasks within a stage, such as testing code and adding weather data (icons on arrows originating and ending on the same box).

146 software development called “continuous integration” (CI). CI combines computing  
 147 environments for running code with monitoring systems to identify changes in data or  
 148 code. Essentially, CI is a computer helper who watches the pipeline and, when it sees a  
 149 change in the code or data, runs all the computer scripts needed to ensure that the  
 150 forecasting pipeline runs from beginning to end. This is useful for iterative near-term  
 151 forecasting because it does not rely on humans to create new forecasts whenever new  
 152 models or data are added. These tools are common in the area of software development,  
 153 where they are used to automate software testing and integrate work by multiple  
 154 developers working on the same code base. However, these tools can be used for any  
 155 computational task that needs to be regularly repeated or run after changes to code or  
 156 data (Beaulieu-Jones & Greene, 2017). Our forecasting pipeline currently runs on a  
 157 publicly available continuous integration service (Travis CI; <https://travis-ci.org/>) that is  
 158 free for open source projects (up to a limited amount of computing time). Because of the  
 159 widespread use of CI in software development, alternative services that can run code on  
 160 local or cloud-based computational infrastructure also exist (Beaulieu-Jones & Greene,  
 161 2017). We use CI to quality check data, test code using “unit tests” (Wilson et al., 2014),  
 162 build models, make forecasts, and publicly present and archive the results (Figure 1b).

163 In addition to automatically running software pipelines, the other key component of  
 164 “continuous analysis” is making sure that the pipelines will continue to run even as  
 165 software dependencies change (Beaulieu-Jones & Greene, 2017). Many of us have  
 166 experienced the frustrations that can occur when software updates (e.g., changes in R  
 167 package versions) create errors in previously functional code. We experienced this issue  
 168 when the `tscount` package (Liboschik et al., 2015), used by one of our forecasting  
 169 models, was temporarily removed from CRAN (the R package repository) and could  
 170 not be installed in the usual way. This broke our forecasting pipeline, as we could no  
 171 longer run models that used that package. To make our pipeline robust to changes in  
 172 external software dependencies, we follow Beaulieu and Greene’s (2017)



173 recommendation to use software containers. Software containers are standalone  
 174 packages that contain copies of everything needed to run a given piece of software,  
 175 including the operating system. Once created, a software container is basically a time  
 176 capsule, containing all the software dependencies in the exact state used to develop and  
 177 run the software. If those dependencies change (or disappear) in the wider world, they  
 178 still exist, unchanged, in the container. We use an existing platform, Docker (Merkel,  
 179 2014), to store an exact image of the complete software environment for running the  
 180 forecasts. Docker also allows a specified set of packages to be used consistently across  
 181 different computer and server environments. Using containers allows us to control  
 182 transitions to new package versions, implementing them only after we have tested them  
 183 and made any necessary changes to the data processing and analysis code. We use a  
 184 container created by the Rocker project, which is a Docker image with many important  
 185 R packages (i.e. tidyverse) pre-installed (Boettiger & Eddelbuettel, 2017). We add our  
 186 code and dependencies to this existing Rocker image to create a software container for  
 187 our forecasting pipeline. In combination, the automated running of the pipeline  
 188 (continuous integration) and the guarantee it will not stop working unexpectedly due to  
 189 software dependencies (via a software container) allows continuous analysis to serve as  
 190 the glue that connects all stages of the forecasting pipeline.

## 191 **Data Collection, Entry, and Processing**

192 Iterative forecasting benefits from frequently updated data so that state changes can be  
 193 quickly incorporated into new forecasts (Dietze et al., 2018). Both frequent data  
 194 collection and rapid processing are important for providing timely forecasts. Since we  
 195 collect data monthly, ensuring that the models have access to the newest data requires a  
 196 data latency period of less than 1 month from collection to availability for modeling. To  
 197 accomplish this, we automated components of the data processing and quality  
 198 assurance/quality control (QA/QC) process to reduce the time needed to add new data

199 to the database (Figure 1).

200 New data are double-entered into Microsoft Excel using the “data validation” feature.  
 201 The two versions are then compared using an R script to control for errors in data entry.  
 202 Quality control (QC) checks using the `testthat` R package (Wickham, 2011) are run  
 203 on the data to test for validity and consistency both within the new data and between the  
 204 new and archived data. The local use of the QC scripts to flag problematic data greatly  
 205 reduces the time spent error-checking and ensures that the quality of data is consistent.  
 206 The cleaned data are then uploaded to the GitHub-based PortalData repository  
 207 (<https://github.com/weecology/PortalData>). GitHub (<https://github.com/>) is a software  
 208 development tool for managing computer code development, but we have also found it  
 209 useful for data management. On GitHub, changes to data can be tracked through the Git  
 210 version control system which logs all changes made to any files in the repository, giving  
 211 us a record of exactly of when specific lines of data were changed or added. All updates  
 212 to data are processed through “pull requests,” which are notifications that someone has a  
 213 modified version of the data to contribute. QA/QC checks are automatically run on the  
 214 submitted data using continuous integration to ensure that no avoidable errors reach the  
 215 official version of the dataset.

216 We also automated the updating of supplementary data tables, including information on  
 217 weather and trapping history, that were previously updated manually. As soon as new  
 218 field data is merged into the repository, continuous integration updates all  
 219 supplementary files. Weather data is automatically fetched from our cellular-connected  
 220 weather station, cleaned, and appended to the weather data table. Supplementary data  
 221 tables related to trapping history are updated based on the data added to the main data  
 222 tables. Using CI for this ensures that all supplementary data tables are always  
 223 up-to-date with the core data.

## 224 **Data Sharing**

225 The Portal Project has a long history of making its data publicly available so that anyone  
 226 can use it for forecasting or other projects. Historically, the publication of the data was  
 227 conducted through data papers (Ernest et al., 2009, Ernest et al. (2016)), the most  
 228 common approach in ecology; this approach, however, caused years of data latency.  
 229 With the recent switch to posting data directly to a public GitHub repository (Figure 1)  
 230 with a CC0 waiver (i.e. no restrictions on data use;  
 231 <https://creativecommons.org/publicdomain/zero/1.0/>), data latency for everyone has  
 232 been reduced to less than one month, making meaningful iterative near-term forecasting  
 233 possible for not only our group but other interested parties, as well.

## 234 **Data Manipulation**

235 Once data is available, it must be processed into a form appropriate for modeling  
 236 (Figure 1). For many ecological datasets, this requires not only simple data  
 237 manipulation but also a good understanding of the data to facilitate appropriate  
 238 aggregation. Data manipulation steps are often conducted using custom one-off code to  
 239 convert the raw data into the desired form (Morris & White, 2013), but this approach  
 240 has several limitations. First, each researcher must develop and maintain their own data  
 241 manipulation code, which is inefficient and can result in different researchers producing  
 242 different versions of the data for the same task. Subtle differences in data processing  
 243 decisions have led to confusion when reproducing results for the Portal data in the past.  
 244 Second, this kind of code is rarely robust to changes in data structure and location.  
 245 Based on our experience developing and maintaining the Data Retriever (Morris &  
 246 White, 2013; Senyondo et al., 2017), these kinds of changes are common. Finally, this  
 247 kind of code is generally poorly tested, which can lead to errors based on mistakes in  
 248 data manipulation. To avoid these issues for the Portal Project data, the Portal team has

249 been developing an R package (portalr; <http://github.com/weecology/portalr>) for  
250 acquiring the data and handling common data cleaning and aggregation tasks. As a  
251 result, our modeling and forecasting code only needs to install this package and run the  
252 data manipulation and summary functions to get the appropriate data (Figure 1b). The  
253 package undergoes thorough automated unit testing to ensure that data manipulations  
254 are achieving the desired results. Having data manipulation code maintained in a  
255 separate package that focuses on consistently providing properly summarized forms of  
256 the most recent data has made maintaining the forecasting code itself much more  
257 straightforward.

## 258 **Modeling and Forecasting**

259 Iterative near-term forecasting involves regularly refitting a variety of different models  
260 (Figure 1). Ideally, new models should be easy to incorporate to allow for iterative  
261 improvements to the general modeling structure and approach. We use CI to refit the  
262 models and make new forecasts each time the modeling code changes and when new  
263 data become available (Figure 1b). We use a plugin infrastructure to allow new models  
264 to be easily added to the system. This approach treats each model as an interchangeable  
265 black box; all models have access to the same input data and generate the same structure  
266 for model outputs (Figure 2). During each run of the forecasting code, all existing  
267 models are run and the standardized outputs are combined into a single file to store the  
268 results of the different models' forecasts. A weighted ensemble model is then added  
269 with weights based on how well individual models fit the training data. This plugin  
270 infrastructure makes it easy to add and compare very different types of models, from the  
271 basic time-series approaches currently implemented to the more complex state-space  
272 and machine learning models we hope to implement in the future. As long as a model  
273 script can load the provided data and produce the appropriate output, it will be run and  
274 its results incorporated into the rest of the forecasting system.

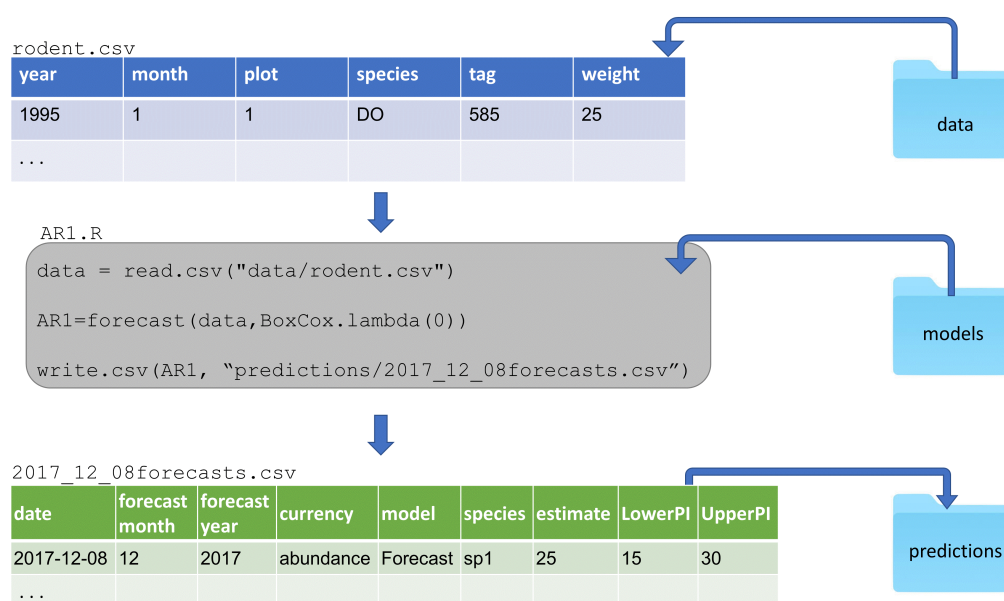

Figure 2: Figure 2. Demonstration of plugin infrastructure. All model scripts (represented here by the example AR1.R) are housed in a single folder. Each model script uses data provided by the core forecasting code (represented here by rodent.csv) and returns its forecast outputs in a predefined structure that is consistent across models (represented here by the example 2017\_12\_08forecasts.csv). Outputs from all models run on a particular date are combined into the same file (i.e. 2017\_12\_08forecasts.csv) to allow cross-model evaluations. Model output files are housed in a folder containing all forecast outputs from all previous dates to facilitate archiving and forecast assessment.

275 In addition to flexibility in what model structures can be supported, we also wanted to  
 276 support flexibility in what the models predict. Allowing models to make forecasts for  
 277 system properties ranging from individual species' population abundances to total  
 278 community biomass facilitates exploration of differences in forecastability across  
 279 different aspects of ecological systems. We designed a forecast output format to support  
 280 this. Each forecast output file contains the date being forecast, the collection date of the  
 281 data used for fitting the models, the model name, the date the forecast was made, the  
 282 state variable being forecast (e.g., rodent biomass, the abundance of a species), and the  
 283 forecast value and associated uncertainty of that forecast (Figure 2). This allows us to  
 284 store a variety of different forecasts in a common format and may serve as a useful  
 285 starting point for developing a standard for storing ecological forecasts more generally.

286 Forecasts are currently evaluated using root mean square error (RMSE) to evaluate  
 287 point forecasts and coverage to evaluate uncertainty. We plan to add additional metrics  
 288 in the future. In addition to evaluating the actual forecasts, we also use hindcasting  
 289 (forecasting on already collected data; Jolliffe & Stephenson, 2003) to gain additional  
 290 insight into the methods that work best for forecasting this system. For example, a  
 291 model is fit using rodent observations up to June 2005, then used to make a forecast 12  
 292 months out to May 2006. The observations of that 12-month period can immediately be  
 293 used to evaluate the model. Since hindcasting is conducted using data that has already  
 294 been collected, it allows model comparisons to be conducted on large numbers of  
 295 hindcasts and provides insight into which models make the best forecasts without  
 296 needing to wait for new data to be collected (Harris et al., 2018). It can also be used to  
 297 quickly evaluate new models instead of waiting for an adequate amount of data to  
 298 accumulate.

## 299 Archiving

300 Publicly archiving forecasts before new data is collected allows the field to assess,  
 301 compare, and build on forecasts made by different groups (McGill, 2012; Tredennick et  
 302 al., 2016; Dietze et al., 2018; Harris et al., 2018) (Figure 1). Archiving serves as a form  
 303 of pre-registration for model predictions because the forecasts cannot be modified once  
 304 the data to assess them has been collected. This helps facilitate an unbiased  
 305 interpretation of model performance. To serve this role, archives should be publicly  
 306 accessible and be a permanent record that cannot be changed or deleted. This second  
 307 criterion means that GitHub is not sufficient for archival purposes because repositories  
 308 can be changed or deleted (Bergman, 2012; White, 2015). We explored three major  
 309 repositories for archiving forecasts: FigShare (<https://figshare.com/>), Zenodo  
 310 (<https://zenodo.org/>), and Open Science Framework (<https://osf.io/>). While all three  
 311 repositories allowed for easy manual submissions (i.e., a human uploading files after  
 312 each forecast), automating this process was substantially more difficult. Various  
 313 combinations of repositories, APIs (i.e., interfaces for automatically interacting with the  
 314 archiving websites), and associated R packages had issues with: 1) integrating  
 315 authorization with continuous integration; 2) automatically making archived files public;  
 316 3) adding new files to an existing location; or 4) automatically permanently archiving  
 317 the files. Our eventual solution was to leverage the GitHub-Zenodo integration  
 318 (<https://guides.github.com/activities/citable-code/>) and automatically push forecasts to a  
 319 GitHub repository from the CI server and release them via the GitHub API. The  
 320 GitHub-Zenodo integration is designed to automatically create versioned archives of  
 321 GitHub repositories. We created a repository for storing forecasts  
 322 (<https://github.com/weecology/forecasts>) and linked this repository with Zenodo (a  
 323 one-time manual process). Each time a new forecast is created, our pipeline adds the  
 324 new forecasts to the GitHub repository and uses the GitHub API to create a new  
 325 “release” for that repository. This triggers the GitHub-Zenodo integration, which

326 automatically archives the resulting forecasts under a top-level DOI that refers to all  
 327 archived forecasts (<https://doi.org/10.5281/zenodo.839580>). Through this process, we  
 328 automatically archive every forecast made with a documented time-stamp. In addition,  
 329 we also archive the full state of the modeling and forecasting repository  
 330 (<https://doi.org/10.5281/zenodo.833438>). This ensures that every forecast is fully  
 331 reproducible since the exact code used to generate every forecast is preserved. Early  
 332 forecasts from this system are archived in the modeling and forecasting code archive,  
 333 not in the newer repository ‘forecasts’.

## 334 **Presentation**

335 Each month, we present our forecasts on a website that displays monthly rodent  
 336 forecasts, model evaluation metrics, monthly reports, and information about the study  
 337 site (Figure 3; <http://portal.naturecast.org>). The website includes a graphical  
 338 presentation of the most recent month’s forecasts (including uncertainty) and compares  
 339 the latest data to the previous forecasts. Information on the species and the field site are  
 340 also included. The site is built using Rmarkdown (Allaire et al., 2017), which naturally  
 341 integrates into the pipeline and is automatically updated after each forecast. The `knitr`  
 342 R package (Xie, 2015) compiles the code into HTML, which is then published using  
 343 Github Pages (<https://pages.github.com/>). The files for the website are stored in a  
 344 subdirectory of the forecasting repository. As a result, the website is also archived  
 345 automatically as part of archiving the forecast results.

## 346 **Discussion**

347 Following the recommendations of Dietze et al (2018), we developed an automated  
 348 iterative forecasting system (Figure 1) to support repeated forecasting of an ecological  
 349 system. Our forecasting system automatically acquires and processes the newest data,



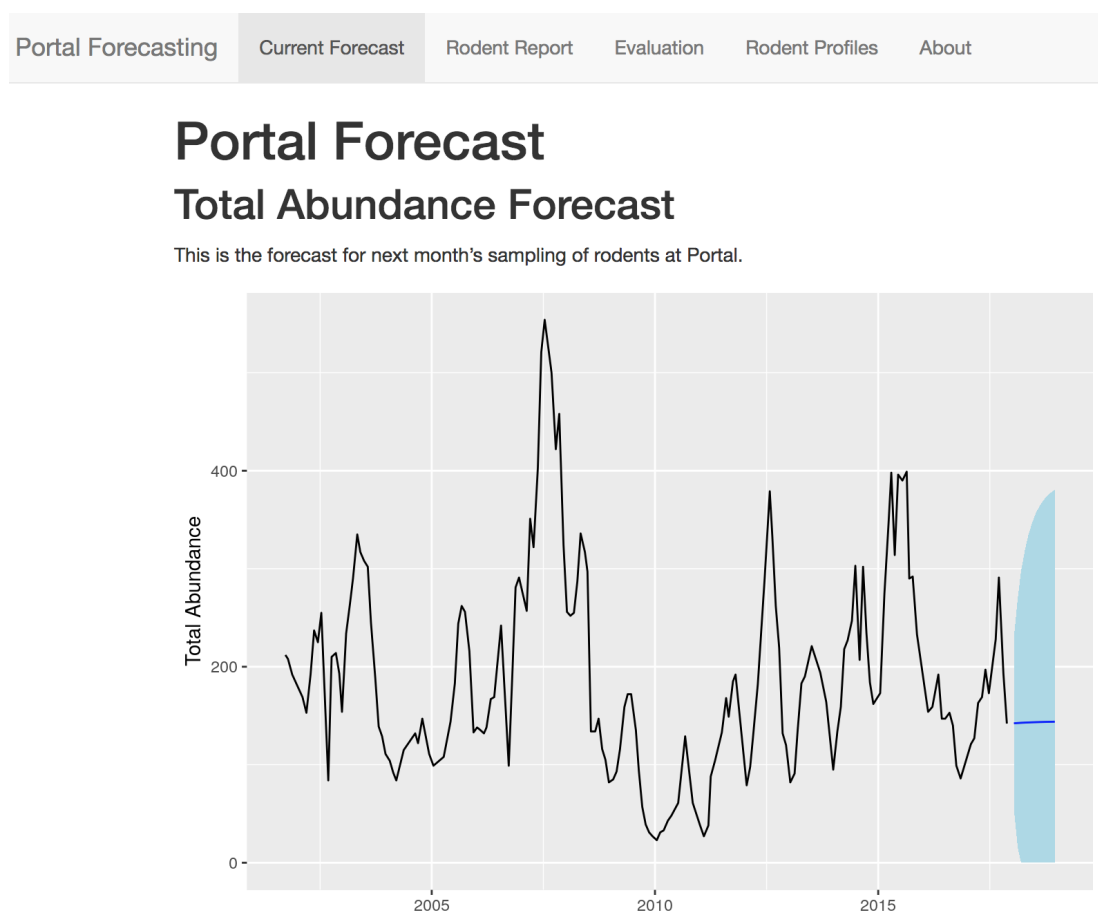

Figure 3: Figure 3. Screen capture of the homepage of the Portal Forecasting website (<http://portal.naturecast.org>). This site contains information on the most current forecasts, evaluation of forecast performance, and general information about the species being forecast.

350 refits the models, makes new forecasts, publicly archives those forecasts, and presents  
 351 both the current forecast and information on how previous forecasts performed. Every  
 352 week, the forecasting system generates a new set of forecasts with no human  
 353 intervention, except for the entry of new field data. Our forecasting system ensures that  
 354 forecasts based on the most recent data are always available and is designed to allow  
 355 rapid assessment of the performance of multiple forecasting models for a number of  
 356 different states of the system, including the abundances of individual species and  
 357 community-level variables such as total abundance. To create this iterative near-term  
 358 forecasting system, we used R to process data and conduct analyses and leveraged  
 359 existing tools and services (i.e. GitHub, Travis, Docker) for more complicated  
 360 cyberinfrastructure tasks. Thus, our approach to developing iterative near-term  
 361 forecasting infrastructure provides an example for how short-term ecological  
 362 forecasting systems can be developed.

363 We designed this forecasting system with the goal of making it relatively easy to build,  
 364 maintain, and extend. We used existing technology for both running the pipeline and  
 365 building individual components, which allowed us to build the system relatively cheaply  
 366 in terms of both time and money. This included the use of tools like Docker for  
 367 reproducibility, Travis CI continuous integration for automatically running the pipeline,  
 368 Rmarkdown and `knitr` for generating the website, and the already existing integration  
 369 between Github and Zenodo to archive the forecasts. By using this “continuous analysis”  
 370 approach (Beaulieu-Jones & Greene, 2017), where analyses are automatically rerun  
 371 when changes are made to data, models, or associated code, we have reduced the time  
 372 required by scientists to run and maintain the forecasting pipeline. To make the system  
 373 extensible so that new models could be easily incorporated, we used a plugin-based  
 374 infrastructure so that adding a new model to the system is as easy as adding a single file  
 375 to the ‘models’ folder in our repository (Figure 2). This should substantially lower the  
 376 barriers to other scientists contributing models to this forecasting effort. We also

377 automatically archive the resulting forecasts publicly so that the performance of these  
378 forecasts can be assessed by both us and other researchers as new data is collected. This  
379 serves as a form of pre-registration by providing a quantitative record of the forecast  
380 before the data being predicted were collected.

381 While building this system was facilitated by the use of existing technological solutions,  
382 there were still a number of challenges in making existing tools work for automated  
383 iterative forecasting. Continuous integration is designed primarily for running  
384 automated tests on software, not for running a coordinated forecasting pipeline. As a  
385 result, extra effort was sometimes necessary to figure out how to get these systems to  
386 work properly in non-standard situations, like running code that was not part of a  
387 software package. In addition, hosted continuous integration solutions, like Travis,  
388 provide only limited computational resources. As the number and complexity of the  
389 models we fit has grown, we have had to continually invest effort in reducing our total  
390 compute time so we can stay within these limits. Finally, we found no satisfactory  
391 existing solution for archiving our results. All approaches we tried had limitations when  
392 it came to automatically generating publicly-versioned archives of forecasts on a  
393 repeated basis, and our eventual solution was difficult to configure to such a degree that  
394 it will remain an impediment for most researchers. Overall, we found existing  
395 technology to be sufficient to the task of creating an iterative forecasting pipeline, but it  
396 required greater expertise and a greater investment of time than is ideal. Additional tool  
397 development to reduce the effort required for scientists to set up their own short-term  
398 forecasting systems would clearly be useful. Our efforts, however, show that it is  
399 possible to use existing tools to develop initial iterative systems as a method for both  
400 advancing scientific understanding and developing proof of concept forecasting systems.

401 Because of the breadth of expertise needed to set up our forecasting pipeline, our effort  
402 required a team with diverse skills and perspectives, ranging from software  
403 development to field site expertise. It is rare to find such breadth within a single

404 research group, and our system was developed as a collaboration between the lab  
 405 collecting the data and a computational ecology lab. When teams have a breadth of  
 406 expertise, communication can be challenging (Winowiecki et al., 2011). We found a  
 407 shared base of knowledge related to both the field research and fundamental  
 408 computational skills was important for the success of the group. The two labs are part of  
 409 a joint interdisciplinary ecology group that has a mission of breaking down barriers  
 410 between field and computational/theoretical ecologists (<http://weecology.org>). Everyone  
 411 on the team had received training in fundamental data management and computing  
 412 skills through a combination of university courses, Software and Data Carpentry  
 413 workshops (Teal et al., 2015), and informal lab training efforts. In addition, everyone  
 414 was broadly familiar with the study site and methods of data collection, and most team  
 415 members had participated in field work at the site on multiple occasions. This provided  
 416 a shared set of knowledge and vocabulary that actively facilitated interdisciplinary  
 417 interactions. Given the current state of tools for forecasting, forecasting teams will need  
 418 people with significant experience in working with continuous integration and APIs.  
 419 This means interdisciplinary teams will generally be required for creating these  
 420 pipelines until tool development improves. To improve the success of these diverse  
 421 groups, we believe efforts at providing ‘team science’ training to scientists interested in  
 422 forecasting will be beneficial for the success of iterative forecasting attempts for the  
 423 foreseeable future (Read et al., 2016).

424 We developed infrastructure for automatically making iterative forecasts with the goals  
 425 of making accurate forecasts for this well-studied system, learning what methods work  
 426 well for ecological forecasting more generally, and improving our understanding of the  
 427 processes driving ecological dynamics. The most obvious application of automated  
 428 iterative ecological forecasting is for speeding up development of forecasting models by  
 429 using the most recent data available and by quickly iterating to improve the models used  
 430 for forecasting. By learning what works best for forecasting in this and other ecological

431 systems, we will better understand what the best approaches are for ecological  
432 forecasting more generally. By designing the pipeline so that it can forecast many  
433 different aspects of the ecological community, we also hope to learn about what aspects  
434 of ecology are more forecastable. Finally, automated forecasting infrastructures like this  
435 one also provide a core foundation for faster scientific inquiry because new models can  
436 quickly be applied to data and compared to existing models. The forecasting  
437 infrastructure does the time-consuming work of data processing, data integration, and  
438 model assessment, allowing new research to focus on the models being developed and  
439 the inferences about the system that can be drawn from them (Dietze et al., 2018). We  
440 plan to use this pipeline to drive future research into understanding the processes that  
441 govern the dynamics of individual populations and the community as a whole. By  
442 regularly running different models for population and community dynamics, a near-term  
443 iterative pipeline such as ours should also make it possible to rapidly detect changes in  
444 how the system is operating, which should allow the rapid identification of ecological  
445 transitions or even possibly allow them to be prevented (Pace et al., 2017). By building  
446 an automated iterative near-term forecasting infrastructure, we can improve our ability  
447 to forecast natural systems, understand the biology driving ecological dynamics, and  
448 detect or even predict changes in system state that are important for conservation and  
449 management.

## 450 **Acknowledgements**

451 We thank Henry Senyondo for help with continuous integration and Hao Ye for  
452 discussions and feedback on the manuscript. We thank all of the graduate students,  
453 postdocs, and volunteers who have collected the Portal Project over the last 40 years  
454 and the developers of the software and tools that made this project possible. This  
455 research was supported by the National Science Foundation through grant 1622425 to

456 S.K.M. Ernest and by the Gordon and Betty Moore Foundation's Data-Driven  
457 Discovery Initiative through grant GBMF4563 to E.P. White.

## 458 **Data Accessibility**

459 The data used in this study is from the Portal Project and is openly available (CC0) on  
460 GitHub (<https://github.com/weecology/PortalData>). Code for reproducing all analyses is  
461 available on GitHub (<https://github.com/weecology/portalPredictions>) and archived on  
462 Zenodo (White et al., 2018b). Forecasts made by this system are all archived to Zenodo  
463 (White et al., 2018a).

## 464 **Box 1. Key practices for automated iterative near-term** 465 **ecological forecasting**

466 A list of some of the key practices developed by Dietze et al (2018) for facilitating  
467 iterative near-term ecological forecasting and discussion of why these practices are  
468 important.

## 469 **Data**

### 470 **1. Frequent data collection**

471 Frequent data collection allows models to be regularly updated and forecasts to be  
472 frequently evaluated (Dietze et al., 2018). Depending on the system being studied, this  
473 frequency could range from sub-daily to annual, but typically the more frequently the  
474 data is collected the better.

### 475 **2. Rapid data release under open licenses**

476 Data should be released as quickly as possible (low latency) under open licenses so that  
477 forecasts can be made frequently and data can be accessed by a community of  
478 forecasters (Vargas et al., 2017; Dietze et al., 2018).

### 479 **3. Best practices in data structure**

480 To reduce the time and effort needed to incorporate data into models, best practices in  
481 data structure should be employed for managing and storing collected data to ensure it  
482 is easy to integrate into other systems (interoperability) (Borer et al., 2009; Strasser et  
483 al., 2011; White et al., 2013).

## 484 **Models**

### 485 **4. Focus on uncertainty**

486 Understanding the uncertainty of forecasts is crucial to interpreting and understanding  
487 their utility. Models used for forecasting should be probabilistic to properly quantify  
488 uncertainty and to convey how this uncertainty increases through time. Evaluation of  
489 forecast models should include assessment of how accurately they quantify uncertainty  
490 as well as point estimates (Hooten & Hobbs, 2015).

### 491 **5. Compare forecasts to simple baselines**

492 Understanding how much information is present in a forecast requires comparing its  
493 accuracy to simple baselines to see if the models yield improvements over the naive  
494 expectation that the system is static (Harris et al., 2018).

### 495 **6. Compare and combine multiple modeling approaches**

496 To quickly learn about the best approaches to forecasting different aspects of ecology,  
497 multiple modeling approaches should be compared (Harris et al., 2018). Different  
498 modeling approaches should also be combined into ensemble models, which often  
499 outperform single models for prediction (Weigel et al., 2008).

## 500 **Cyberinfrastructure**

501 In addition to improvements in data and models, iterative near-term forecasting requires  
502 improved infrastructure and approaches to support continuous model development and  
503 iterative forecasting (Dietze et al., 2018).

## 504 **7. Best practices in software development**

505 Best practices should be followed in the development of scientific software and  
506 modeling to make it easier to maintain, integrate into pipelines, and build on by other  
507 researchers. Key best practices include open licenses, good documentation, version  
508 control, and cross-platform support (Wilson et al., 2014; Hampton et al., 2015).

## 509 **8. Support easy inclusion of new models**

510 To facilitate the comparison and ensembling of different modeling approaches, code for  
511 fitting models and making forecasts should be easily extensible, to allow models  
512 developed by different groups to be integrated into a single framework (Dietze et al.,  
513 2018).

## 514 **9. Automated end-to-end reproducibility**

515 Each forecast iteration involves acquiring new data, refitting the models, and making  
516 new forecasts. This should be done automatically without requiring human intervention.  
517 Therefore, the process of making forecasts should emphasize end-to-end reproducibility,  
518 including data, models, and evaluation (Stodden & Miguez, 2014), to allow the  
519 forecasts to be easily rerun as new data becomes available (Dietze et al., 2018).

## 520 **10. Publicly archive forecasts**

521 Forecasts should be openly archived to demonstrate that the forecasts were made  
522 without knowledge of the outcomes and to allow the community to assess and compare  
523 the performance of different forecasting approaches both now and in the future (McGill,  
524 2012; Tredennick et al., 2016; Dietze et al., 2018; Harris et al., 2018). Ideally, the



525 forecasts and evaluation of their performance should be automatically posted publicly in  
526 a manner that is understandable by both scientists and the broader stakeholder  
527 community.

## 528 **References**

- 529 Allaire, J., Cheng, J., Xie, Y., McPherson, J., Chang, W., Allen, J., . . . Arslan, R. (2017).  
530 *Rmarkdown: Dynamic documents for r*. Retrieved from  
531 <https://CRAN.R-project.org/package=rmarkdown>
- 532 Araujo, M. B., & New, M. (2007). Ensemble forecasts of species distributions. *Trends*  
533 *in Ecology and Evolution*, 22(1), 42–47.
- 534 Beaulieu-Jones, B. K., & Greene, C. S. (2017). Reproducibility of computational  
535 workflows is automated using continuous analysis. *Nature Biotechnology*, 35(4),  
536 342–346.
- 537 Bergman, C. (2012). On the preservation of published bioinformatics code on github.  
538 Retrieved from [https://caseybergman.wordpress.com/2012/11/08/](https://caseybergman.wordpress.com/2012/11/08/on-the-preservation-of-published-bioinformatics-code-on-github/)  
539 [on-the-preservation-of-published-bioinformatics-code-on-github/](https://caseybergman.wordpress.com/2012/11/08/on-the-preservation-of-published-bioinformatics-code-on-github/)
- 540 Boettiger, C., & Eddelbuettel, D. (2017). An introduction to rocker: Docker containers  
541 for r. *ArXiv Preprint ArXiv:1710.03675*.
- 542 Borer, E. T., Seabloom, E. W., Jones, M. B., & Schildhauer, M. (2009). Some simple  
543 guidelines for effective data management. *The Bulletin of the Ecological Society of*  
544 *America*, 90(2), 205–214.
- 545 Brown, J. H. (1998). The desert granivory experiments at portal. *Experimental Ecology*.  
546 *Oxford University Press, Oxford, UK*, 71–95.
- 547 Clark, J. S., Carpenter, S. R., Barber, M., Collins, S., Dobson, A., Foley, J. A., . . . others.

- (2001). Ecological forecasts: An emerging imperative. *Science*, 293(5530), 657–660.
- Dietze, M. C. (2017). *Ecological forecasting*. Princeton University Press.
- Dietze, M. C., Fox, A., Beck-Johnson, L. M., Betancourt, J. L., Hooten, M. B., Jarnevich, C. S., ... White, E. P. (2018). Iterative near-term ecological forecasting: Needs, opportunities, and challenges. *Proceedings of the National Academy of Sciences*. doi:10.1073/pnas.1710231115
- Diniz-Filho, J. A. F., Bini, L. M., Rangel, T. F., Loyola, R. D., Hof, C., Nogues-Bravo, D., & Araujo, M. B. (2009). Partitioning and mapping uncertainties in ensembles of forecasts of species turnover under climate change. *Ecography*, 32(6), 897–906.
- Díaz, S., Demissew, S., Carabias, J., Joly, C., Lonsdale, M., Ash, N., ... others. (2015). The ipbes conceptual framework—connecting nature and people. *Current Opinion in Environmental Sustainability*, 14, 1–16.
- Ernest, S. K. M., Brown, J. H., Thibault, K. M., White, E. P., & Goheen, J. R. (2008). Zero sum, the niche, and metacommunities: Long-term dynamics of community assembly. *The American Naturalist*, 172(6), E257–E269.
- Ernest, S. K. M., Valone, T. J., & Brown, J. H. (2009). Long-term monitoring and experimental manipulation of a chihuahuan desert ecosystem near portal, arizona, usa. *Ecology*, 90(6), 1708–1708.
- Ernest, S. K. M., Yenni, G. M., Allington, G., Christensen, E. M., Geluso, K., Goheen, J. R., ... Valone, T. J. (2016). Long-term monitoring and experimental manipulation of a chihuahuan desert ecosystem near portal, arizona (1977–2013). *Ecology*, 97(4), 1082–1082.
- Hampton, S. E., Anderson, S. S., Bagby, S. C., Gries, C., Han, X., Hart, E. M., ... others. (2015). The tao of open science for ecology. *Ecosphere*, 6(7), 1–13.
- Harris, D. J., Taylor, S. D., & White, E. P. (2018). Forecasting biodiversity in breeding

573 birds using best practices. *PeerJ*.

574 Hooten, M. B., & Hobbs, N. (2015). A guide to bayesian model selection for ecologists.  
575 *Ecological Monographs*, 85(1), 3–28.

576 Jolliffe, I. T., & Stephenson, D. B. (Eds.). (2003). *Forecast verification: a practitioner's*  
577 *guide in atmospheric science*. John Wiley; Sons, Ltd. Retrieved from  
578 <http://linkinghub.elsevier.com/retrieve/pii/S0169207005001214>

579 Liboschik, T., Fokianos, K., & Fried, R. (2015). *Tscount: An r package for analysis of*  
580 *count time series following generalized linear models*. Universitätsbibliothek  
581 Dortmund.

582 Luo, Y., Ogle, K., Tucker, C., Fei, S., Gao, C., LaDeau, S., . . . Schimel, D. S. (2011).  
583 Ecological forecasting and data assimilation in a data-rich era. *Ecological Applications*,  
584 21(5), 1429–1442.

585 McGill, B. J. (2012). Ecologists need to do a better job of prediction – part ii – partly  
586 cloudy and a 20% chance of extinction (or the 6 p's of good prediction). Retrieved from  
587 [https://dynamicecology.wordpress.com/2013/01/09/](https://dynamicecology.wordpress.com/2013/01/09/ecologists-need-to-do-a-better-job-of-prediction-part-ii-mechanism-vs-pattern/)  
588 [ecologists-need-to-do-a-better-job-of-prediction-part-ii-mechanism-vs-pattern/](https://dynamicecology.wordpress.com/2013/01/09/ecologists-need-to-do-a-better-job-of-prediction-part-ii-mechanism-vs-pattern/)

589 Merkel, D. (2014). Docker: Lightweight linux containers for consistent development  
590 and deployment. *Linux J*, 2014(239). Retrieved from  
591 <http://dl.acm.org/citation.cfm?id=2600239.2600241>

592 Morris, B. D., & White, E. P. (2013). The ecodata retriever: Improving access to  
593 existing ecological data. *PloS One*, 8(6), e65848.

594 Pace, M. L., Batt, R. D., Buelo, C. D., Carpenter, S. R., Cole, J. J., Kurtzweil, J. T., &  
595 Wilkinson, G. M. (2017). Reversal of a cyanobacterial bloom in response to early  
596 warnings. *Proceedings of the National Academy of Sciences*, 114(2), 352–357.

597 Petchey, O. L., Pontarp, M., Massie, T. M., Kéfi, S., Ozgul, A., Weilenmann, M., . . .

598 others. (2015). The ecological forecast horizon, and examples of its uses and  
599 determinants. *Ecology Letters*, 18(7), 597–611.

600 Read, E. K., O'Rourke, M., Hong, G., Hanson, P., Winslow, L. A., Crowley, S., ...  
601 Weathers, K. (2016). Building the team for team science. *Ecosphere*, 7(3).

602 Senyondo, H., Morris, B. D., Goel, A., Zhang, A., Narasimha, A., Negi, S., ... White,  
603 E. P. (2017). Retriever: Data retrieval tool. *The Journal of Open Source Software*, 2(19),  
604 451. doi:10.21105/joss.00451

605 Stodden, V., & Miguez, S. (2014). Best practices for computational science: Software  
606 infrastructure and environments for reproducible and extensible research. *Journal of*  
607 *Open Research Software*, 2(1).

608 Strasser, C., Cook, R., Michener, W., Budden, A., & Koskela, R. (2011). Promoting data  
609 stewardship through best practices. In *Proceedings of the environmental information*  
610 *management conference 2011 (eim 2011)*. Oak Ridge National Laboratory (ORNL).

611 Tallis, H. M., & Kareiva, P. (2006). Shaping global environmental decisions using  
612 socio-ecological models. *Trends in Ecology & Evolution*, 21(10), 562–568.

613 Teal, T. K., Cranston, K. A., Lapp, H., White, E., Wilson, G., Ram, K., & Pawlik, A.  
614 (2015). Data carpentry: Workshops to increase data literacy for researchers.  
615 *International Journal of Digital Curation*, 10(1), 135–143.

616 Tredennick, A. T., Hooten, M. B., Aldridge, C. L., Homer, C. G., Kleinhesselink, A. R.,  
617 & Adler, P. B. (2016). Forecasting climate change impacts on plant populations over  
618 large spatial extents. *Ecosphere*, 7(10).

619 Vargas, R., Alcaraz-Segura, D., Birdsey, R., Brunsell, N. A., Cruz-Gaistardo, C. O.,  
620 Jong, B. de, ... others. (2017). Enhancing interoperability to facilitate implementation  
621 of redd+: Case study of mexico. *Carbon Management*, 8(1), 57–65.

622 Weigel, A. P., Liniger, M., & Appenzeller, C. (2008). Can multi-model combination

- 623 really enhance the prediction skill of probabilistic ensemble forecasts? *Quarterly*  
624 *Journal of the Royal Meteorological Society*, 134(630), 241–260.
- 625 White, E. P. (2015). Some thoughts on best publishing practices for scientific software.  
626 *Ideas in Ecology and Evolution*, 8(1).
- 627 White, E. P., Baldridge, E., Brym, Z. T., Locey, K. J., McGlinn, D. J., & Supp, S. R.  
628 (2013). Nine simple ways to make it easier to (re) use your data. *Ideas in Ecology and*  
629 *Evolution*, 6(2).
- 630 White, E. P., Bledsoe, E. K., Christensen, E. M., Harris, D. J., Simonis, J. L., Taylor, S.  
631 D., ... Ernest, S. K. M. (2018a, February). Weecology/forecasts: 2018-02-17.  
632 doi:10.5281/zenodo.839580
- 633 White, E. P., Yenni, G. M., Taylor, C., Shawn D and, Bledsoe, E. K., Simonis, J. L., &  
634 Ernest, S. K. M. (2018b, February). Weecology/portalPredictions 2018-02-16.  
635 doi:10.5281/zenodo.833438
- 636 Wickham, H. (2011). Testthat: Get started with testing. *The R Journal*, 3, 5–10.  
637 Retrieved from  
638 [http://journal.r-project.org/archive/2011-1/RJournal\\_2011-1\\_Wickham.pdf](http://journal.r-project.org/archive/2011-1/RJournal_2011-1_Wickham.pdf)
- 639 Wilson, G., Aruliah, D. A., Brown, C. T., Hong, N. P. C., Davis, M., Guy, R. T., ...  
640 others. (2014). Best practices for scientific computing. *PLoS Biology*, 12(1), e1001745.
- 641 Winowiecki, L., Smukler, S., Shirley, K., Remans, R., Peltier, G., Lothes, E., ...  
642 Alkema, L. (2011). Tools for enhancing interdisciplinary communication.  
643 *Sustainability: Science, Practice and Policy*, 7(1), 74–80.
- 644 Xie, Y. (2015). *Dynamic documents with r and knitr* (Vol. 29). CRC Press.
